# Supplementary material for: Size class structure, growth rates, and orientation of the central Andean cushion Azorella compacta
Source: PeerJ. 2015 Mar 17;3:e843. doi: 10.7717/peerj.843 (PMC4369329; doi:10.7717/peerj.843)
Supplement: Supplemental Information 2 — Sizes of A. compacta from 1998 to 2012. [file peerj-03-843-s002.xlsx]

## Sheet: Permananent Plot 2000
Plant #	Height	Length	Width	Perimeter	M or F	% Mortality	Fruits
Tag I.D.	(cm)	(cm)	(cm)	(m)			%
727	24	41	112	2.5	U	10	0
728	103	180	189	6.17	F	0	25
729	34	68	90	2	F	20	10
730	13	25	31	0.78	U	15	0
731	60	260	120	4.3	F	0	50
732	17	83	143	3.9	F	30	10
733	25	174	250	6.82	F	25	10
734	18	21	74	0.64	U	0	0
735	75	95	145	3.45	F	5	30
736	113	217	234	6.13	F	20	35	very resinous
737	49	69	93	3.1	M	0	40
738	45	113	135	4.8	M	25	15
739	22	24	43	1.15	U	5	0
740			MIA
741	108	174	166	4.3	F	10	20
742	30	116	79	3.61	F	15	25
743	97	165	165	5.12	M	15	20
744	61	165	237	8.1	M	50	10
745	24	98	93	4.47	F	5	30
746	43	380	254	8.64	M	10	10
747	9	11	17	0.34		0	0
748	74	187	187	5.51	M	5	20
749			MIA
750	83	92	120	5.62	F	0	20

## Sheet: Permanent Plot 2012
Plant #	Height	Length	Width	Perimeter	M or F	% Mortality	Direction Mort.	Fruits	Flowers
Tag I.D.	(cm)	(cm)	(cm)	(m)				%
727
728
729
730	19	34	25	0.88		35	SW	0
731	61	160	129	4.23	F	15	N	5		Nail and plant changed to 749 tag since that tag is missing
732
733
734
735
736	110	254	243	5.23	f	15	SE	4
737
738
739	22	44	24	1.11	?	90	N				First plant!
740
741
742	32	114	79	3.92	F	8	E	0			Nail
743	108	176	187	5.37	M	8	SW	25			Nail
744
745	33	127	102	4.3	F	1	W	3	5
746	40	250	350	8.25	M	15	S		0
747
748	93	209	177	4.94	M	5	SW		15
749
750
	Found ten plants less than 5 cm in diameter
	Elevation - 14,773
	Lat. S 18 11.768'
	Long. W 69 15.195'
	Directions: Follow trail out of refugio to first road crossing. Turn right on road and follow all the way to the bofedales.
		As the road leaves the bofedales and turns to the right, leave the road for north facing slope.

## Sheet: Compare
Plant #	Height (2012)	Length (2012)	Width (2012)	Perimeter (2012	M or F (2012)	% Mortality (2012)	Fruits 2012	Flowers (2012)	Plant #	Height	Length	Width	Perimeter	M or F	% Mortality	Fruits		Height D	Length D	Width D	Peri D
730	19	34	25	0.88		35	0		730	13	25	31	0.78	U	15	0		6	9	-6	0.1
731	61	160	129	4.23	F	15	5		731	60	260	120	4.3	F	0	50		1	-100	9	-0.07
736	110	254	243	5.23	f	15	4		736	113	217	234	6.13	F	20	35		-3	37	9	-0.9
739	22	44	24	1.11	?	90			739	22	24	43	1.15	U	5	0		0	20	-19	-0.04
742	32	114	79	3.92	F	8	0		742	30	116	79	3.61	F	15	25		2	-2	0	0.31
743	108	176	187	5.37	M	8	25		743	97	165	165	5.12	M	15	20		11	11	22	0.25
745	33	127	102	4.3	F	1	3	5	745	24	98	93	4.47	F	5	30		9	29	9	-0.17
746	40	250	350	8.25	M	15		0	746	43	380	254	8.64	M	10	10		-3	-130	96	-0.39
748	93	209	177	4.94	M	5		15	748	74	187	187	5.51	M	5	20		19	22	-10	-0.57
	57.5556	152	146.222	4.24778		21.3333	6.16667	6.66667	740	52.8889	163.556	134	4.41222		10	21.1111		4.66667	-11.5556	12.2222	-0.164444
																		4.66667	-11.5556	12.2222	-0.164444
																		0.388889	-0.962963	1.01852	-0.0137037	0.107685	cm per year
	2 pi r 2																					0.011 cm per year
	2012									2000								CHANGE
	2267.08									1061.32								1205.76
	23367.9									22608								759.88
	75988									80189.3								-4201.32
	3039.52									3039.52								0
	6430.72									5652								778.72
	73249.9									59088.5								14161.4
	6838.92									3617.28								3221.64
	10048									11611.7								-1563.72
	54315.7									34389.3								19926.4
	20803.4									17566.6								3236.76		3752.556 divided by 12 is 312.7 cm 2 per year.
																	AVG	3752.56	is the cm2 change in hemispherical area, but not a perfect hemisphere, over 12 years.
																	SD	7456.4
	Peri 2012									Peri 2000			Change				SE	2485.47
	0.88									0.78			0.1
	4.23									4.3			-0.07
	5.23									6.13			-0.9
	1.11									1.15			-0.04
	3.92									3.61			0.31
	5.37									5.12			0.25
	4.3									4.47			-0.17
	8.25									8.64			-0.39
	4.94									5.51			-0.57
													-0.164444	looking solely at perimeter, plants shrunk 0.164 m or 16.4 cm over 12 years, or about 1.36 cm per year!
	LxW-2012									L xW -2000			Change (2012-2000)
	850									775			75
	20640									31200			-10560
	61722									50778			10944
	1056									1032			24							Hemi	312.7
	9006									9164			-158							LxW	26.4444
	32912									27225			5687							Avg.	169.572
	12954									9114			3840									Above is the AVERAGE CM SQARED growth rate per year!
	87500									96520			-9020
	36993									34969			2024
													317.333	is the average growth cm 2 (LxW) over 12 years
													26.4444	is the average growth of cm2 (LxW) over one year
	Height -2012									Height -2000			Change
	19									13			6
	61									60			1
	110									113			-3
	22									22			0
	32									30			2
	108									97			11
	33									24			9
	40									43			-3
	93									74			19
													4.66667	is the change in cm of height over 12 years, or 0.389 cm a year.
													4.66667	0.388889

## Sheet: Sheet1
2000	2012		2000	2012
1061.32	2267.08		1.06132	2.26708
3039.52	3039.52		3.03952	3.03952
3617.28	6838.92		3.61728	6.83892
5652	6430.72		5.652	6.43072
11611.7	10048		11.6117	10.048
17566.6	29610.9		17.5666	29.6109
22608	23367.9		22.608	23.3679
34389.3	54315.7		34.3893	54.3157
59088.5	73249.9		59.0885	73.2499
80189.3	75988		80.1893	75.988
	2000	2012
	0.78	0.88
	1.15	1.11
	3.61	3.92
	4.3	4.23
	4.47	4.3
	5.12	5.37
	5.51	4.94
	6.13	5.23
	8.64	8.25

## Sheet: Sheet2
Perimeter (2012	Perimeter
0.88	0.78	0.1	0.113636
4.23	4.3	-0.07	-0.0165485
5.23	6.13	-0.9	-0.172084
1.11	1.15	-0.04	-0.036036
3.92	3.61	0.31	0.0790816
5.37	5.12	0.25	0.0465549
4.3	4.47	-0.17	-0.0395349
8.25	8.64	-0.39	-0.0472727
4.94	5.51	-0.57	-0.115385
0.88	0.113636
1.11	-0.036036
3.92	0.0790816
4.23	-0.0165485
4.3	-0.0395349
4.94	-0.115385
5.23	-0.172084
5.37	0.0465549
8.25	-0.0472727
