# Supplementary material for: Size class structure, growth rates, and orientation of the central Andean cushion Azorella compacta
Source: PeerJ. 2015 Mar 17;3:e843. doi: 10.7717/peerj.843 (PMC4369329; doi:10.7717/peerj.843)
Supplement: Supplemental Information 3 — Size data for 100 m transects—measuring 406 individual plants. [file peerj-03-843-s003.xlsx]

## Sheet: Sheet2
SUMMARY OUTPUT
Regression Statistics
Multiple R	0.137028
R Square	0.0187766
Adjusted R Square	0.0163478
Standard Error	421.256
Observations	406
ANOVA
	df	SS	MS	F	Significance F
Regression	1	1.3719e+06	1.3719e+06	7.73091	0.00568222
Residual	404	7.16925e+07	177457
Total	405	7.30644e+07
	Coefficients	Standard Error	t Stat	P-value	Lower 95%	Upper 95%	Lower 95.0%	Upper 95.0%
Intercept	-602.337	323.016	-1.86473	0.0629448	-1237.34	32.6659	-1237.34	32.6659
X Variable 1	0.186206	0.0669698	2.78045	0.00568222	0.0545535	0.317859	0.0545535	0.317859

## Sheet: Transects
Transect Number	Latitude	Longitude	Elevation	Distance on Tape	Length (cm)	Width (cm)	HxW	Perimeter	Area (m2)
1	18° S 12.019'	W 69° 16.037	5050.87	70	110	70	7700	360	77
1	18° S 12.019'	W 69° 16.037	5050.87	45	96	55	5280	302	52.8
1	18° S 12.019'	W 69° 16.037	5050.87	73	100	80	8000	360	80
1	18° S 12.019'	W 69° 16.037	5050.87	90	132	150	19800	564	198
1	18° S 12.019'	W 69° 16.037	5050.87	5	145	70	10150	430	101.5
1	18° S 12.019'	W 69° 16.037	5050.87	5	130	77	10010	414	100.1
2	18° S 12.024'	W 69° 15.982	5070.36	22	22	20	440	84	4.4
2	18° S 12.024'	W 69° 15.982	5070.36	16	56	42	2352	196	23.52
2	18° S 12.024'	W 69° 15.982	5070.36	42	54	55	2970	218	29.7
2	18° S 12.024'	W 69° 15.982	5070.36	79	123	87	10701	420	107.01
2	18° S 12.024'	W 69° 15.982	5070.36	21	22	62	1364	168	13.64
2	18° S 12.024'	W 69° 15.982	5070.36	15	102	123	12546	450	125.46
2	18° S 12.024'	W 69° 15.982	5070.36	80	36	93	3348	258	33.48
2	18° S 12.024'	W 69° 15.982	5070.36	380	380	320	121600	1400	1216
2	18° S 12.024'	W 69° 15.982	5070.36	51	60	29	1740	178	17.4
2	18° S 12.024'	W 69° 15.982	5070.36	111	115	164	18860	558	188.6
2	18° S 12.024'	W 69° 15.982	5070.36	75	125	145	18125	540	181.25
2	18° S 12.024'	W 69° 15.982	5070.36	64	231	148	34188	758	341.88
2	18° S 12.024'	W 69° 15.982	5070.36	50	80	51	4080	262	40.8
3	18° S 12.001'	W 69° 15.943	5080.45	200	233	149	34717	764	347.17
3	18° S 12.001'	W 69° 15.943	5080.45	12	168	90	15120	516	151.2
3	18° S 12.001'	W 69° 15.943	5080.45	18	64	75	4800	278	48
3	18° S 12.001'	W 69° 15.943	5080.45	32	80	49	3920	258	39.2
3	18° S 12.001'	W 69° 15.943	5080.45	71	135	125	16875	520	168.75
3	18° S 12.001'	W 69° 15.943	5080.45	69	65	83	5395	296	53.95
3	18° S 12.001'	W 69° 15.943	5080.45	75	170	75	12750	490	127.5
3	18° S 12.001'	W 69° 15.943	5080.45	144	277	203	56231	960	562.31
3	18° S 12.001'	W 69° 15.943	5080.45	5	154	113	17402	534	174.02
3	18° S 12.001'	W 69° 15.943	5080.45	90	124	69	8556	386	85.56
3	18° S 12.001'	W 69° 15.943	5080.45	131	116	144	16704	520	167.04
3	18° S 12.001'	W 69° 15.943	5080.45	7	12	6	72	36	0.72
3	18° S 12.001'	W 69° 15.943	5080.45	56	196	91	17836	574	178.36
3	18° S 12.001'	W 69° 15.943	5080.45	60	242	201	48642	886	486.42
3	18° S 12.001'	W 69° 15.943	5080.45	3	80	34	2720	228	27.2
3	18° S 12.001'	W 69° 15.943	5080.45	5	14	8	112	44	1.12
4	18° S 11.970'	W 69° 15.897	5092.98	104	120	79	9480	398	94.8
4	18° S 11.970'	W 69° 15.897	5092.98	122	204	280	57120	968	571.2
4	18° S 11.970'	W 69° 15.897	5092.98	47	130	125	16250	510	162.5
4	18° S 11.970'	W 69° 15.897	5092.98	16	310	197	61070	1014	610.7
4	18° S 11.970'	W 69° 15.897	5092.98	28	28	17	476	90	4.76
4	18° S 11.970'	W 69° 15.897	5092.98	32	73	42	3066	230	30.66
4	18° S 11.970'	W 69° 15.897	5092.98	110	205	325	66625	1060	666.25
4	18° S 11.970'	W 69° 15.897	5092.98	1	12	7	84	38	0.84
4	18° S 11.970'	W 69° 15.897	5092.98	53	127	155	19685	564	196.85
4	18° S 11.970'	W 69° 15.897	5092.98	117	165	155	25575	640	255.75
4	18° S 11.970'	W 69° 15.897	5092.98	166	166	128	21248	588	212.48
4	18° S 11.970'	W 69° 15.897	5092.98	24	157	76	11932	466	119.32
5	18° S 12.554'	W 69° 16.132'	4454	106	195	256	49920	902	499.2
5	18° S 12.554'	W 69° 16.132'	4454	31	35	39	1365	148	13.65
5	18° S 12.554'	W 69° 16.132'	4454	3	4	5	20	18	0.2
5	18° S 12.554'	W 69° 16.132'	4454	5	5	2	10	14	0.1
5	18° S 12.554'	W 69° 16.132'	4454	38	81	105	8505	372	85.05
5	18° S 12.554'	W 69° 16.132'	4454	16	98	68	6664	332	66.64
5	18° S 12.554'	W 69° 16.132'	4454	68	195	152	29640	694	296.4
5	18° S 12.554'	W 69° 16.132'	4454	12	210	146	30660	712	306.6
5	18° S 12.554'	W 69° 16.132'	4454	8	12	7	84	38	0.84
5	18° S 12.554'	W 69° 16.132'	4454	59	190	177	33630	734	336.3
5	18° S 12.554'	W 69° 16.132'	4454	97	146	185	27010	662	270.1
5	18° S 12.554'	W 69° 16.132'	4454	15	164	83	13612	494	136.12
5	18° S 12.554'	W 69° 16.132'	4454	63	90	74	6660	328	66.6
5	18° S 12.554'	W 69° 16.132'	4454	5	10	10	100	40	1
5	18° S 12.554'	W 69° 16.132'	4454	131	172	130	22360	604	223.6
5	18° S 12.554'	W 69° 16.132'	4454	250	385	307	118195	1384	1181.95
5	18° S 12.554'	W 69° 16.132'	4454	61	71	50	3550	242	35.5
5	18° S 12.554'	W 69° 16.132'	4454	3	4	3	12	14	0.12
5	18° S 12.554'	W 69° 16.132'	4454	72	116	92	10672	416	106.72
5	18° S 12.554'	W 69° 16.132'	4454	94	144	211	30384	710	303.84
5	18° S 12.554'	W 69° 16.132'	4454	5	6	4	24	20	0.24
6	18° S 11.767'	W 69° 15.190	5143.44	323	182	186	33852	736	338.52
6	18° S 11.767'	W 69° 15.190	5143.44	93	170	121	20570	582	205.7
6	18° S 11.767'	W 69° 15.190	5143.44	127	289	230	66470	1038	664.7
6	18° S 11.767'	W 69° 15.190	5143.44	2	2	1	2	6	0.02
6	18° S 11.767'	W 69° 15.190	5143.44	3	7	4	28	22	0.28
6	18° S 11.767'	W 69° 15.190	5143.44	50	230	185	42550	830	425.5
6	18° S 11.767'	W 69° 15.190	5143.44	67	190	231	43890	842	438.9
6	18° S 11.767'	W 69° 15.190	5143.44	7	32	26	832	116	8.32
6	18° S 11.767'	W 69° 15.190	5143.44	159	233	270	62910	1006	629.1
6	18° S 11.767'	W 69° 15.190	5143.44	69	130	95	12350	450	123.5
6	18° S 11.767'	W 69° 15.190	5143.44	18	148	190	28120	676	281.2
6	18° S 11.767'	W 69° 15.190	5143.44	21	100	80	8000	360	80
6	18° S 11.767'	W 69° 15.190	5143.44	4	34	24	816	116	8.16
6	18° S 11.767'	W 69° 15.190	5143.44	68	170	51	8670	442	86.7
7	18° S 11.796'	W 69° 15.157	5150.05	126	137	490	67130	1254	671.3
7	18° S 11.796'	W 69° 15.157	5150.05	1	2	6	12	16	0.12
7	18° S 11.796'	W 69° 15.157	5150.05	160	403	360	145080	1526	1450.8
7	18° S 11.796'	W 69° 15.157	5150.05	63	223	338	75374	1122	753.74
7	18° S 11.796'	W 69° 15.157	5150.05	35	77	48	3696	250	36.96
7	18° S 11.796'	W 69° 15.157	5150.05	1	1	1	1	4	0.01
7	18° S 11.796'	W 69° 15.157	5150.05	3	4	2	8	12	0.08
7	18° S 11.796'	W 69° 15.157	5150.05	187	199	328	65272	1054	652.72
7	18° S 11.796'	W 69° 15.157	5150.05	2	7	3	21	20	0.21
7	18° S 11.796'	W 69° 15.157	5150.05	20	276	344	94944	1240	949.44
7	18° S 11.796'	W 69° 15.157	5150.05	11	115	165	18975	560	189.75
7	18° S 11.796'	W 69° 15.157	5150.05	80	180	461	82980	1282	829.8
7	18° S 11.796'	W 69° 15.157	5150.05	86	140	140	19600	560	196
7	18° S 11.796'	W 69° 15.157	5150.05	5	60	75	4500	270	45
8	18° S 11.813'	W 69° 15.172'	5146.57	455	455	620	282100	2150	2821
8	18° S 11.813'	W 69° 15.172'	5146.57	143	152	185	28120	674	281.2
8	18° S 11.813'	W 69° 15.172'	5146.57	73	155	75	11625	460	116.25
8	18° S 11.813'	W 69° 15.172'	5146.57	34	305	119	36295	848	362.95
8	18° S 11.813'	W 69° 15.172'	5146.57	16	154	170	26180	648	261.8
8	18° S 11.813'	W 69° 15.172'	5146.57	4	17	8	136	50	1.36
8	18° S 11.813'	W 69° 15.172'	5146.57	56	317	187	59279	1008	592.79
8	18° S 11.813'	W 69° 15.172'	5146.57	63	98	83	8134	362	81.34
8	18° S 11.813'	W 69° 15.172'	5146.57	182	206	267	55002	946	550.02
8	18° S 11.813'	W 69° 15.172'	5146.57	12	180	102	18360	564	183.6
8	18° S 11.813'	W 69° 15.172'	5146.57	127	195	190	37050	770	370.5
8	18° S 11.813'	W 69° 15.172'	5146.57	73	128	141	18048	538	180.48
9	18° S 11.837'	W 69° 15044.'	5152.49	345	545	945	515025	2980	5150.25
9	18° S 11.837'	W 69° 15044.'	5152.49	12	360	440	158400	1600	1584
9	18° S 11.837'	W 69° 15044.'	5152.49	71	247	254	62738	1002	627.38
9	18° S 11.837'	W 69° 15044.'	5152.49	63	360	400	144000	1520	1440
9	18° S 11.837'	W 69° 15044.'	5152.49	170	280	182	50960	924	509.6
9	18° S 11.837'	W 69° 15044.'	5152.49	6	7	10	70	34	0.7
9	18° S 11.837'	W 69° 15044.'	5152.49	32	83	94	7802	354	78.02
9	18° S 11.837'	W 69° 15044.'	5152.49	12	175	127	22225	604	222.25
9	18° S 11.837'	W 69° 15044.'	5152.49	10	107	42	4494	298	44.94
9	18° S 11.837'	W 69° 15044.'	5152.49	360	617	290	178930	1814	1789.3
9	18° S 11.837'	W 69° 15044.'	5152.49	120	414	327	135378	1482	1353.78
9	18° S 11.837'	W 69° 15044.'	5152.49	95	130	170	22100	600	221
10	18° S 11.849'	W 69° 14.968.'	5158.06	170	270	215	58050	970	580.5
10	18° S 11.849'	W 69° 14.968.'	5158.06	320	300	170	51000	940	510
10	18° S 11.849'	W 69° 14.968.'	5158.06	40	90	140	12600	460	126
10	18° S 11.849'	W 69° 14.968.'	5158.06	115	180	328	59040	1016	590.4
10	18° S 11.849'	W 69° 14.968.'	5158.06	52	165	71	11715	472	117.15
10	18° S 11.849'	W 69° 14.968.'	5158.06	12	186	75	13950	522	139.5
10	18° S 11.849'	W 69° 14.968.'	5158.06	64	128	161	20608	578	206.08
10	18° S 11.849'	W 69° 14.968.'	5158.06	62	431	265	114215	1392	1142.15
10	18° S 11.849'	W 69° 14.968.'	5158.06	35	350	200	70000	1100	700
10	18° S 11.849'	W 69° 14.968.'	5158.06	65	170	148	25160	636	251.6
10	18° S 11.849'	W 69° 14.968.'	5158.06	2	9	12	108	42	1.08
10	18° S 11.849'	W 69° 14.968.'	5158.06	57	125	180	22500	610	225
10	18° S 11.849'	W 69° 14.968.'	5158.06	70	155	114	17670	538	176.7
10	18° S 11.849'	W 69° 14.968.'	5158.06	81	160	139	22240	598	222.4
10	18° S 11.849'	W 69° 14.968.'	5158.06	52	150	89	13350	478	133.5
10	18° S 11.849'	W 69° 14.968.'	5158.06	63	165	167	27555	664	275.55
10	18° S 11.849'	W 69° 14.968.'	5158.06	44	145	115	16675	520	166.75
10	18° S 11.849'	W 69° 14.968.'	5158.06	12	125	44	5500	338	55
10	18° S 11.849'	W 69° 14.968.'	5158.06	140	340	190	64600	1060	646
10	18° S 11.849'	W 69° 14.968.'	5158.06	25	85	77	6545	324	65.45
10	18° S 11.849'	W 69° 14.968.'	5158.06	155	220	177	38940	794	389.4
11	18° S 11.856'	W 69° 14.909'	5181.72	390	310	390	120900	1400	1209
11	18° S 11.856'	W 69° 14.909'	5181.72	40	147	131	19257	556	192.57
11	18° S 11.856'	W 69° 14.909'	5181.72	45	450	360	162000	1620	1620
11	18° S 11.856'	W 69° 14.909'	5181.72	23	275	190	52250	930	522.5
11	18° S 11.856'	W 69° 14.909'	5181.72	95	314	439	137846	1506	1378.46
11	18° S 11.856'	W 69° 14.909'	5181.72	65	178	140	24920	636	249.2
11	18° S 11.856'	W 69° 14.909'	5181.72	360	480	340	163200	1640	1632
11	18° S 11.856'	W 69° 14.909'	5181.72	300	362	370	133940	1464	1339.4
11	18° S 11.856'	W 69° 14.909'	5181.72	55	310	159	49290	938	492.9
11	18° S 11.856'	W 69° 14.909'	5181.72	12	87	75	6525	324	65.25
12	18° S 11.902'	W 69° 14.843'	5176.5	511	589	44	25916	1266	259.16
12	18° S 11.902'	W 69° 14.843'	5176.5	250	410	430	176300	1680	1763
12	18° S 11.902'	W 69° 14.843'	5176.5	230	400	339	135600	1478	1356
12	18° S 11.902'	W 69° 14.843'	5176.5	15	345	290	100050	1270	1000.5
12	18° S 11.902'	W 69° 14.843'	5176.5	4	4	3	12	14	0.12
12	18° S 11.902'	W 69° 14.843'	5176.5	211	220	197	43340	834	433.4
12	18° S 11.902'	W 69° 14.843'	5176.5	60	80	50	4000	260	40
12	18° S 11.902'	W 69° 14.843'	5176.5	50	200	145	29000	690	290
12	18° S 11.902'	W 69° 14.843'	5176.5	1	1	3	3	8	0.03
12	18° S 11.902'	W 69° 14.843'	5176.5	5	7	5	35	24	0.35
12	18° S 11.902'	W 69° 14.843'	5176.5	90	185	150	27750	670	277.5
12	18° S 11.902'	W 69° 14.843'	5176.5	3	3	4	12	14	0.12
12	18° S 11.902'	W 69° 14.843'	5176.5	5	45	20	900	130	9
12	18° S 11.902'	W 69° 14.843'	5176.5	90	146	173	25258	638	252.58
12	18° S 11.902'	W 69° 14.843'	5176.5	88	95	110	10450	410	104.5
12	18° S 11.902'	W 69° 14.843'	5176.5	95	96	54	5184	300	51.84
12	18° S 11.902'	W 69° 14.843'	5176.5	11	11	14	154	50	1.54
12	18° S 11.902'	W 69° 14.843'	5176.5	69	140	115	16100	510	161
13	18° S 13.019'	W 69° 16.420'	5116.99	70	155	150	23250	610	232.5
13	18° S 13.019'	W 69° 16.420'	5116.99	65	275	205	56375	960	563.75
13	18° S 13.019'	W 69° 16.420'	5116.99	5	25	11	275	72	2.75
13	18° S 13.019'	W 69° 16.420'	5116.99	240	138	379	52302	1034	523.02
13	18° S 13.019'	W 69° 16.420'	5116.99	164	227	227	51529	908	515.29
13	18° S 13.019'	W 69° 16.420'	5116.99	67	260	190	49400	900	494
13	18° S 13.019'	W 69° 16.420'	5116.99	84	195	110	21450	610	214.5
13	18° S 13.019'	W 69° 16.420'	5116.99	73	95	100	9500	390	95
13	18° S 13.019'	W 69° 16.420'	5116.99	2	12	4	48	32	0.48
13	18° S 13.019'	W 69° 16.420'	5116.99	53	60	83	4980	286	49.8
13	18° S 13.019'	W 69° 16.420'	5116.99	77	156	167	26052	646	260.52
13	18° S 13.019'	W 69° 16.420'	5116.99	6	26	7	182	66	1.82
13	18° S 13.019'	W 69° 16.420'	5116.99	111	282	91	25662	746	256.62
13	18° S 13.019'	W 69° 16.420'	5116.99	78	159	136	21624	590	216.24
14	18° S 12.980'	W 69° 16.385'	5113.51	110	164	130	21320	588	213.2
14	18° S 12.980'	W 69° 16.385'	5113.51	66	110	136	14960	492	149.6
14	18° S 12.980'	W 69° 16.385'	5113.51	23	345	180	62100	1050	621
14	18° S 12.980'	W 69° 16.385'	5113.51	139	180	146	26280	652	262.8
14	18° S 12.980'	W 69° 16.385'	5113.51	74	117	122	14274	478	142.74
14	18° S 12.980'	W 69° 16.385'	5113.51	80	260	159	41340	838	413.4
14	18° S 12.980'	W 69° 16.385'	5113.51	68	166	134	22244	600	222.44
14	18° S 12.980'	W 69° 16.385'	5113.51	10	73	94	6862	334	68.62
14	18° S 12.980'	W 69° 16.385'	5113.51	33	83	129	10707	424	107.07
14	18° S 12.980'	W 69° 16.385'	5113.51	4	8	6	48	28	0.48
14	18° S 12.980'	W 69° 16.385'	5113.51	33	344	185	63640	1058	636.4
14	18° S 12.980'	W 69° 16.385'	5113.51	22	95	162	15390	514	153.9
14	18° S 12.980'	W 69° 16.385'	5113.51	142	270	137	36990	814	369.9
15	18° S 14.786'	W 69° 14.501'	4982	100	150	111	16650	522	166.5
15	18° S 14.786'	W 69° 14.501'	4982	164	175	175	30625	700	306.25
15	18° S 14.786'	W 69° 14.501'	4982	27	47	29	1363	152	13.63
15	18° S 14.786'	W 69° 14.501'	4982	13	19	21	399	80	3.99
15	18° S 14.786'	W 69° 14.501'	4982	105	137	150	20550	574	205.5
15	18° S 14.786'	W 69° 14.501'	4982	28	142	100	14200	484	142
15	18° S 14.786'	W 69° 14.501'	4982	104	106	185	19610	582	196.1
15	18° S 14.786'	W 69° 14.501'	4982	45	189	329	62181	1036	621.81
15	18° S 14.786'	W 69° 14.501'	4982	12	70	57	3990	254	39.9
15	18° S 14.786'	W 69° 14.501'	4982	46	218	97	21146	630	211.46
15	18° S 14.786'	W 69° 14.501'	4982	43	120	85	10200	410	102
15	18° S 14.786'	W 69° 14.501'	4982	105	137	134	18358	542	183.58
16	18° S 14.736'	W 69° 14.551'	4965	220	245	126	30870	742	308.7
16	18° S 14.736'	W 69° 14.551'	4965	59	79	56	4424	270	44.24
16	18° S 14.736'	W 69° 14.551'	4965	16	136	104	14144	480	141.44
16	18° S 14.736'	W 69° 14.551'	4965	2	12	4	48	32	0.48
16	18° S 14.736'	W 69° 14.551'	4965	33	129	126	16254	510	162.54
16	18° S 14.736'	W 69° 14.551'	4965	148	180	184	33120	728	331.2
16	18° S 14.736'	W 69° 14.551'	4965	116	128	152	19456	560	194.56
16	18° S 14.736'	W 69° 14.551'	4965	12	120	102	12240	444	122.4
16	18° S 14.736'	W 69° 14.551'	4965	5	8	6	48	28	0.48
16	18° S 14.736'	W 69° 14.551'	4965	168	284	167	47428	902	474.28
16	18° S 14.736'	W 69° 14.551'	4965	98	230	205	47150	870	471.5
16	18° S 14.736'	W 69° 14.551'	4965	107	174	143	24882	634	248.82
16	18° S 14.736'	W 69° 14.551'	4965	5	60	31	1860	182	18.6
16	18° S 14.736'	W 69° 14.551'	4965	78	197	122	24034	638	240.34
17	18° S 16.391'	W 69° 9.691'	4592	139	167	119	19873	572	198.73
17	18° S 16.391'	W 69° 9.691'	4592	31	154	157	24178	622	241.78
17	18° S 16.391'	W 69° 9.691'	4592	1	2	4	8	12	0.08
17	18° S 16.391'	W 69° 9.691'	4592	74	122	127	15494	498	154.94
17	18° S 16.391'	W 69° 9.691'	4592	150	195	199	38805	788	388.05
17	18° S 16.391'	W 69° 9.691'	4592	145	194	209	40546	806	405.46
17	18° S 16.391'	W 69° 9.691'	4592	3	10	3	30	26	0.3
17	18° S 16.391'	W 69° 9.691'	4592	15	62	44	2728	212	27.28
17	18° S 16.391'	W 69° 9.691'	4592	72	190	247	46930	874	469.3
17	18° S 16.391'	W 69° 9.691'	4592	5	40	35	1400	150	14
17	18° S 16.391'	W 69° 9.691'	4592	116	166	120	19920	572	199.2
17	18° S 16.391'	W 69° 9.691'	4592	66	142	161	22862	606	228.62
17	18° S 16.391'	W 69° 9.691'	4592	43	82	71	5822	306	58.22
17	18° S 16.391'	W 69° 9.691'	4592	13	80	54	4320	268	43.2
17	18° S 16.391'	W 69° 9.691'	4592	82	179	170	30430	698	304.3
18	18° S 16.418'	W 69° 9.709'	4597	86	88	97	8536	370	85.36
18	18° S 16.418'	W 69° 9.709'	4597	23	47	34	1598	162	15.98
18	18° S 16.418'	W 69° 9.709'	4597	124	161	166	26726	654	267.26
18	18° S 16.418'	W 69° 9.709'	4597	1	1	2	2	6	0.02
18	18° S 16.418'	W 69° 9.709'	4597	239	233	305	71065	1076	710.65
18	18° S 16.418'	W 69° 9.709'	4597	5	80	90	7200	340	72
18	18° S 16.418'	W 69° 9.709'	4597	99	127	144	18288	542	182.88
18	18° S 16.418'	W 69° 9.709'	4597	7	43	18	774	122	7.74
18	18° S 16.418'	W 69° 9.709'	4597	31	175	226	39550	802	395.5
18	18° S 16.418'	W 69° 9.709'	4597	8	130	113	14690	486	146.9
18	18° S 16.418'	W 69° 9.709'	4597	166	203	191	38773	788	387.73
18	18° S 16.418'	W 69° 9.709'	4597	59	144	92	13248	472	132.48
19	18° S 16.501'	W 69° 9.480'	4570	132	166	209	34694	750	346.94
19	18° S 16.501'	W 69° 9.480'	4570	210	332	155	51460	974	514.6
19	18° S 16.501'	W 69° 9.480'	4570	12	215	270	58050	970	580.5
19	18° S 16.501'	W 69° 9.480'	4570	98	295	199	58705	988	587.05
19	18° S 16.501'	W 69° 9.480'	4570	14	14	13	182	54	1.82
19	18° S 16.501'	W 69° 9.480'	4570	44	307	365	112055	1344	1120.55
19	18° S 16.501'	W 69° 9.480'	4570	67	151	92	13892	486	138.92
19	18° S 16.501'	W 69° 9.480'	4570	115	173	140	24220	626	242.2
19	18° S 16.501'	W 69° 9.480'	4570	53	107	130	13910	474	139.1
19	18° S 16.501'	W 69° 9.480'	4570	170	198	206	40788	808	407.88
19	18° S 16.501'	W 69° 9.480'	4570	38	194	173	33562	734	335.62
19	18° S 16.501'	W 69° 9.480'	4570	32	55	95	5225	300	52.25
19	18° S 16.501'	W 69° 9.480'	4570	50	360	265	95400	1250	954
19	18° S 16.501'	W 69° 9.480'	4570	4	38	21	798	118	7.98
19	18° S 16.501'	W 69° 9.480'	4570	75	49	80	3920	258	39.2
19	18° S 16.501'	W 69° 9.480'	4570	59	154	128	19712	564	197.12
19	18° S 16.501'	W 69° 9.480'	4570	14	10	23	230	66	2.3
19	18° S 16.501'	W 69° 9.480'	4570	122	141	119	16779	520	167.79
20	18° S 15.100'	W 69° 10.655'	4579	210	220	167	36740	774	367.4
20	18° S 15.100'	W 69° 10.655'	4579	140	139	260	36140	798	361.4
20	18° S 15.100'	W 69° 10.655'	4579	202	205	189	38745	788	387.45
20	18° S 15.100'	W 69° 10.655'	4579	66	233	216	50328	898	503.28
20	18° S 15.100'	W 69° 10.655'	4579	171	214	130	27820	688	278.2
20	18° S 15.100'	W 69° 10.655'	4579	5	6	7	42	26	0.42
20	18° S 15.100'	W 69° 10.655'	4579	128	229	122	27938	702	279.38
20	18° S 15.100'	W 69° 10.655'	4579	5	10	8	80	36	0.8
20	18° S 15.100'	W 69° 10.655'	4579	107	117	121	14157	476	141.57
21	18° S 14.707'	W 69° 10.854'	4590	229	290	231	66990	1042	669.9
21	18° S 14.707'	W 69° 10.854'	4590	62	145	159	23055	608	230.55
21	18° S 14.707'	W 69° 10.854'	4590	75	91	137	12467	456	124.67
21	18° S 14.707'	W 69° 10.854'	4590	86	164	208	34112	744	341.12
21	18° S 14.707'	W 69° 10.854'	4590	79	122	91	11102	426	111.02
21	18° S 14.707'	W 69° 10.854'	4590	36	100	107	10700	414	107
21	18° S 14.707'	W 69° 10.854'	4590	10	166	103	17098	538	170.98
21	18° S 14.707'	W 69° 10.854'	4590	1	2	5	10	14	0.1
21	18° S 14.707'	W 69° 10.854'	4590	2	25	11	275	72	2.75
22	18° S 13.368'	W 69° 14.735'	4615	103	197	144	28368	682	283.68
22	18° S 13.368'	W 69° 14.735'	4615	34	54	80	4320	268	43.2
22	18° S 13.368'	W 69° 14.735'	4615	107	93	254	23622	694	236.22
22	18° S 13.368'	W 69° 14.735'	4615	68	181	144	26064	650	260.64
22	18° S 13.368'	W 69° 14.735'	4615	49	57	104	5928	322	59.28
22	18° S 13.368'	W 69° 14.735'	4615	10	19	23	437	84	4.37
22	18° S 13.368'	W 69° 14.735'	4615	160	227	239	54253	932	542.53
22	18° S 13.368'	W 69° 14.735'	4615	63	137	121	16577	516	165.77
22	18° S 13.368'	W 69° 14.735'	4615	121	80	163	13040	486	130.4
22	18° S 13.368'	W 69° 14.735'	4615	5	17	28	476	90	4.76
22	18° S 13.368'	W 69° 14.735'	4615	19	33	23	759	112	7.59
22	18° S 13.368'	W 69° 14.735'	4615	21	51	24	1224	150	12.24
22	18° S 13.368'	W 69° 14.735'	4615	12	50	32	1600	164	16
22	18° S 13.368'	W 69° 14.735'	4615	105	125	99	12375	448	123.75
22	18° S 13.368'	W 69° 14.735'	4615	60	60	74	4440	268	44.4
22	18° S 13.368'	W 69° 14.735'	4615	72	134	73	9782	414	97.82
23	18° S 05.933'	W 69° 32.608'	4767	174	174	189	32886	726	328.86
23	18° S 05.933'	W 69° 32.608'	4767	170	260	280	72800	1080	728
23	18° S 05.933'	W 69° 32.608'	4767	33	82	55	4510	274	45.1
23	18° S 05.933'	W 69° 32.608'	4767	68	207	80	16560	574	165.6
23	18° S 05.933'	W 69° 32.608'	4767	41	56	75	4200	262	42
23	18° S 05.933'	W 69° 32.608'	4767	48	124	149	18476	546	184.76
23	18° S 05.933'	W 69° 32.608'	4767	6	8	12	96	40	0.96
23	18° S 05.933'	W 69° 32.608'	4767	4	6	10	60	32	0.6
23	18° S 05.933'	W 69° 32.608'	4767	82	178	140	24920	636	249.2
24	18° S 05.927'	W 69° 32.667'	4760	265	265	157	41605	844	416.05
24	18° S 05.927'	W 69° 32.667'	4760	23	109	262	28558	742	285.58
24	18° S 05.927'	W 69° 32.667'	4760	6	21	15	315	72	3.15
24	18° S 05.927'	W 69° 32.667'	4760	83	254	122	30988	752	309.88
24	18° S 05.927'	W 69° 32.667'	4760	105	220	87	19140	614	191.4
24	18° S 05.927'	W 69° 32.667'	4760	8	276	135	37260	822	372.6
24	18° S 05.927'	W 69° 32.667'	4760	22	60	36	2160	192	21.6
24	18° S 05.927'	W 69° 32.667'	4760	33	157	176	27632	666	276.32
24	18° S 05.927'	W 69° 32.667'	4760	62	178	100	17800	556	178
24	18° S 05.927'	W 69° 32.667'	4760	22	55	90	4950	290	49.5
24	18° S 05.927'	W 69° 32.667'	4760	120	270	131	35370	802	353.7
24	18° S 05.927'	W 69° 32.667'	4760	80	300	177	53100	954	531
25	18° S 07.810'	W 69° 32.833'	4506	110	150	123	18450	546	184.5
25	18° S 07.810'	W 69° 32.833'	4506	130	160	229	36640	778	366.4
25	18° S 07.810'	W 69° 32.833'	4506	260	430	223	95890	1306	958.9
25	18° S 07.810'	W 69° 32.833'	4506	66	290	164	47560	908	475.6
25	18° S 07.810'	W 69° 32.833'	4506	264	561	192	107712	1506	1077.12
25	18° S 07.810'	W 69° 32.833'	4506	80	165	118	19470	566	194.7
25	18° S 07.810'	W 69° 32.833'	4506	42	281	174	48894	910	488.94
25	18° S 07.810'	W 69° 32.833'	4506	10	40	30	1200	140	12
25	18° S 07.810'	W 69° 32.833'	4506	118	320	270	86400	1180	864
25	18° S 07.810'	W 69° 32.833'	4506	179	320	195	62400	1030	624
25	18° S 07.810'	W 69° 32.833'	4506	69	207	280	57960	974	579.6
25	18° S 07.810'	W 69° 32.833'	4506	106	170	213	36210	766	362.1
25	18° S 07.810'	W 69° 32.833'	4506	119	223	255	56865	956	568.65
25	18° S 07.810'	W 69° 32.833'	4506	60	115	124	14260	478	142.6
25	18° S 07.810'	W 69° 32.833'	4506	31	164	197	32308	722	323.08
25	18° S 07.810'	W 69° 32.833'	4506	54	39	345	13455	768	134.55
26	18° S 08.296'	W 69° 32.845'	4415	83	245	170	41650	830	416.5
26	18° S 08.296'	W 69° 32.845'	4415	85	150	123	18450	546	184.5
26	18° S 08.296'	W 69° 32.845'	4415	91	134	160	21440	588	214.4
26	18° S 08.296'	W 69° 32.845'	4415	42	117	112	13104	458	131.04
26	18° S 08.296'	W 69° 32.845'	4415	184	270	244	65880	1028	658.8
26	18° S 08.296'	W 69° 32.845'	4415	195	260	255	66300	1030	663
26	18° S 08.296'	W 69° 32.845'	4415	101	470	154	72380	1248	723.8
26	18° S 08.296'	W 69° 32.845'	4415	1	11	4	44	30	0.44
26	18° S 08.296'	W 69° 32.845'	4415	129	206	190	39140	792	391.4
26	18° S 08.296'	W 69° 32.845'	4415	90	185	205	37925	780	379.25
26	18° S 08.296'	W 69° 32.845'	4415	124	370	190	70300	1120	703
27	18° S 08.338'	W 69° 32.812'	4455	195	170	261	44370	862	443.7
27	18° S 08.338'	W 69° 32.812'	4455	115	229	141	32289	740	322.89
27	18° S 08.338'	W 69° 32.812'	4455	5	34	25	850	118	8.5
27	18° S 08.338'	W 69° 32.812'	4455	142	212	160	33920	744	339.2
27	18° S 08.338'	W 69° 32.812'	4455	103	180	190	34200	740	342
27	18° S 08.338'	W 69° 32.812'	4455	12	80	91	7280	342	72.8
27	18° S 08.338'	W 69° 32.812'	4455	233	367	346	126982	1426	1269.82
27	18° S 08.338'	W 69° 32.812'	4455	126	175	190	33250	730	332.5
27	18° S 08.338'	W 69° 32.812'	4455	171	230	318	73140	1096	731.4
28	18° S 09.970'	W 69° 31.251'	4247	133	172	157	27004	658	270.04
28	18° S 09.970'	W 69° 31.251'	4247	118	260	117	30420	754	304.2
28	18° S 09.970'	W 69° 31.251'	4247	43	259	189	48951	896	489.51
28	18° S 09.970'	W 69° 31.251'	4247	54	67	64	4288	262	42.88
28	18° S 09.970'	W 69° 31.251'	4247	59	103	91	9373	388	93.73
28	18° S 09.970'	W 69° 31.251'	4247	28	176	55	9680	462	96.8
28	18° S 09.970'	W 69° 31.251'	4247	98	240	134	32160	748	321.6
28	18° S 09.970'	W 69° 31.251'	4247	56	100	85	8500	370	85
28	18° S 09.970'	W 69° 31.251'	4247	99	140	117	16380	514	163.8
28	18° S 09.970'	W 69° 31.251'	4247	210	440	339	149160	1558	1491.6
28	18° S 09.970'	W 69° 31.251'	4247	34	146	125	18250	542	182.5
28	18° S 09.970'	W 69° 31.251'	4247	14	17	15	255	64	2.55
28	18° S 09.970'	W 69° 31.251'	4247	29	34	33	1122	134	11.22
28	18° S 09.970'	W 69° 31.251'	4247	5	8	10	80	36	0.8
28	18° S 09.970'	W 69° 31.251'	4247	60	85	80	6800	330	68
28	18° S 09.970'	W 69° 31.251'	4247	9	106	88	9328	388	93.28
28	18° S 09.970'	W 69° 31.251'	4247	138	148	176	26048	648	260.48
28	18° S 09.970'	W 69° 31.251'	4247	137	221	204	45084	850	450.84
28	18° S 09.970'	W 69° 31.251'	4247	36	87	90	7830	354	78.3
28	18° S 09.970'	W 69° 31.251'	4247	42	148	116	17168	528	171.68
28	18° S 09.970'	W 69° 31.251'	4247	26	33	36	1188	138	11.88
28	18° S 09.970'	W 69° 31.251'	4247	101	127	138	17526	530	175.26
28	18° S 09.970'	W 69° 31.251'	4247	30	32	31	992	126	9.92
28	18° S 09.970'	W 69° 31.251'	4247	66	55	55	3025	220	30.25
29	18° S 18.032'	W 69° 23.164'	4457	184	201	227	45627	856	456.27
29	18° S 18.032'	W 69° 23.164'	4457	5	10	4	40	28	0.4
29	18° S 18.032'	W 69° 23.164'	4457	12	75	118	8850	386	88.5
29	18° S 18.032'	W 69° 23.164'	4457	8	73	96	7008	338	70.08
29	18° S 18.032'	W 69° 23.164'	4457	6	14	9	126	46	1.26
29	18° S 18.032'	W 69° 23.164'	4457	24	164	181	29684	690	296.84
29	18° S 18.032'	W 69° 23.164'	4457	11	61	77	4697	276	46.97
29	18° S 18.032'	W 69° 23.164'	4457	77	210	175	36750	770	367.5
29	18° S 18.032'	W 69° 23.164'	4457	20	86	90	7740	352	77.4
29	18° S 18.032'	W 69° 23.164'	4457	155	205	143	29315	696	293.15
29	18° S 18.032'	W 69° 23.164'	4457	3	27	10	270	74	2.7
29	18° S 18.032'	W 69° 23.164'	4457	62	63	72	4536	270	45.36
29	18° S 18.032'	W 69° 23.164'	4457	5	239	185	44215	848	442.15
30	18° S 12.101'	W 69° 25.123'	4570	95	105	100	10500	410	105
30	18° S 12.101'	W 69° 25.123'	4570	160	204	204	41616	816	416.16
30	18° S 12.101'	W 69° 25.123'	4570	11	117	68	7956	370	79.56
30	18° S 12.101'	W 69° 25.123'	4570	33	220	116	25520	672	255.2
30	18° S 12.101'	W 69° 25.123'	4570	9	67	59	3953	252	39.53
30	18° S 12.101'	W 69° 25.123'	4570	5	5	9	45	28	0.45
30	18° S 12.101'	W 69° 25.123'	4570	9	24	14	336	76	3.36
30	18° S 12.101'	W 69° 25.123'	4570	58	118	93	10974	422	109.74
30	18° S 12.101'	W 69° 25.123'	4570	14	66	103	6798	338	67.98
30	18° S 12.101'	W 69° 25.123'	4570	16	66	72	4752	276	47.52
30	18° S 12.101'	W 69° 25.123'	4570	35	148	97	14356	490	143.56

## Sheet: Numberpertransect
Plot Number	Latitude	Longitude	Elevation	Number of Plants
1	18° S 12.019'	W 69° 16.037	4424	6
2	18° S 12.024'	W 69° 15.982	4441	13
3	18° S 12.001'	W 69° 15.943	4450	16
4	18° S 11.970'	W 69° 15.897	4461	12
5	18° S 12.554'	W 69° 16.132'	4454	21	Near Parinacota
6	18° S 11.767'	W 69° 15.190	5143.44	14
7	18° S 11.796'	W 69° 15.157	5150.05	14
8	18° S 11.813'	W 69° 15.172'	5146.57	12
9	18° S 11.837'	W 69° 15044.'	5152.49	12
10	18° S 11.849'	W 69° 14.968.'	5158.06	21
11	18° S 11.856'	W 69° 14.909'	5181.72	10
12	18° S 11.902'	W 69° 14.843'	5176.5	18
13	18° S 13.019'	W 69° 16.420'	5116.99	14
14	18° S 12.980'	W 69° 16.385'	5113.51	13
15	18° S 14.786'	W 69° 14.501'	4982	12
16	18° S 14.736'	W 69° 14.551'	4965	14
17	18° S 16.391'	W 69° 9.691'	4592	15
18	18° S 16.418'	W 69° 9.709'	4597	12
19	18° S 16.501'	W 69° 9.480'	4570	18
20	18° S 15.100'	W 69° 10.655'	4579	9
21	18° S 14.707'	W 69° 10.854'	4590	9
22	18° S 13.368'	W 69° 14.735'	4615	16
23	18° S 05.933'	W 69° 32.608'	4775	9
24	18° S 05.927'	W 69° 32.667'	4760	12
25	18° S 07.810'	W 69° 32.833'	4521	16
26	18° S 08.296'	W 69° 32.845'	4415	11
27	18° S 08.338'	W 69° 32.812'	4463	9
28	18° S 09.970'	W 69° 31.251'	4247	24
29	18° S 18.032'	W 69° 23.164'	4469	13
30	18° S 12.101'	W 69° 25.123'	4570	11
				406
				13.5333
				69.4862

## Sheet: Plpertrans
Plot Number	Latitude	Longitude	Elevation	Number of Plants
28	18° S 09.970'	W 69° 31.251'	4247	24
26	18° S 08.296'	W 69° 32.845'	4415	11
1	18° S 12.019'	W 69° 16.037	4424	6
2	18° S 12.024'	W 69° 15.982	4441	13
3	18° S 12.001'	W 69° 15.943	4450	16
5	18° S 12.554'	W 69° 16.132'	4454	21
4	18° S 11.970'	W 69° 15.897	4461	12
27	18° S 08.338'	W 69° 32.812'	4463	9
29	18° S 18.032'	W 69° 23.164'	4469	13
25	18° S 07.810'	W 69° 32.833'	4521	16
19	18° S 16.501'	W 69° 9.480'	4570	18
30	18° S 12.101'	W 69° 25.123'	4570	11
20	18° S 15.100'	W 69° 10.655'	4579	9
21	18° S 14.707'	W 69° 10.854'	4590	9
17	18° S 16.391'	W 69° 9.691'	4592	15
18	18° S 16.418'	W 69° 9.709'	4597	12
22	18° S 13.368'	W 69° 14.735'	4615	16
24	18° S 05.927'	W 69° 32.667'	4760	12
23	18° S 05.933'	W 69° 32.608'	4775	9
16	18° S 14.736'	W 69° 14.551'	4965	14
15	18° S 14.786'	W 69° 14.501'	4982	12
14	18° S 12.980'	W 69° 16.385'	5113.51	13
13	18° S 13.019'	W 69° 16.420'	5116.99	14
6	18° S 11.767'	W 69° 15.190	5143.44	14
8	18° S 11.813'	W 69° 15.172'	5146.57	12
7	18° S 11.796'	W 69° 15.157	5150.05	14
9	18° S 11.837'	W 69° 15044.'	5152.49	12
10	18° S 11.849'	W 69° 14.968.'	5158.06	21
12	18° S 11.902'	W 69° 14.843'	5176.5	18
11	18° S 11.856'	W 69° 14.909'	5181.72	10
				406
				13.5333
				69.4862

## Sheet: Sheet1
Bin	Frequency
1	1		1000
25752.2	252		25000
51503.4	88		50000
77254.6	38		75000
103006	6		100000
128757	7
154508	7
180259	5
206011	0
231762	0
257513	0
283264	1
309015	0
334767	0
360518	0
386269	0
412020	0
437771	0
463523	0
489274	0
More	1

## Sheet: Histogram
HxW (cm 2)
7700
5280	10000	1
8000	20000	2
19800	30000	3
10150	40000	4
10010	50000	5
440	60000	6
2352	70000	7
2970	80000	8
10701	90000	9
1364	100000	10
12546	110000	11
3348	120000	12
121600	130000	13
1740	140000	14
18860
18125
34188
4080
34717
15120
4800
3920
16875
5395
12750
56231
17402
8556
16704
72
17836
48642
2720
112
9480
57120
16250
61070
476
3066
66625
84
19685
25575
21248
11932
49920
1365
20
10
8505
6664
29640
30660
84
33630
27010
13612
6660
100
22360
118195
3550
12
10672
30384
24
33852
20570
66470
2
28
42550
43890
832
62910
12350
28120
8000
816
8670
67130
12
145080
75374
3696
1
8
65272
21
94944
18975
82980
19600
4500
282100
28120
11625
36295
26180
136
59279
8134
55002
18360
37050
18048
515025
158400
62738
144000
50960
70
7802
22225
4494
178930
135378
22100
58050
51000
12600
59040
11715
13950
20608
114215
70000
25160
108
22500
17670
22240
13350
27555
16675
5500
64600
6545
38940
120900
19257
162000
52250
137846
24920
163200
133940
49290
6525
25916
176300
135600
100050
12
43340
4000
29000
3
35
27750
12
900
25258
10450
5184
154
16100
23250
56375
275
52302
51529
49400
21450
9500
48
4980
26052
182
25662
21624
21320
14960
62100
26280
14274
41340
22244
6862
10707
48
63640
15390
36990
16650
30625
1363
399
20550
14200
19610
62181
3990
21146
10200
18358
30870
4424
14144
48
16254
33120
19456
12240
48
47428
47150
24882
1860
24034
19873
24178
8
15494
38805
40546
30
2728
46930
1400
19920
22862
5822
4320
30430
8536
1598
26726
2
71065
7200
18288
774
39550
14690
38773
13248
34694
51460
58050
58705
182
112055
13892
24220
13910
40788
33562
5225
95400
798
3920
19712
230
16779
36740
36140
38745
50328
27820
42
27938
80
14157
66990
23055
12467
34112
11102
10700
17098
10
275
28368
4320
23622
26064
5928
437
54253
16577
13040
476
759
1224
1600
12375
4440
9782
32886
72800
4510
16560
4200
18476
96
60
24920
41605
28558
315
30988
19140
37260
2160
27632
17800
4950
35370
53100
18450
36640
95890
47560
107712
19470
48894
1200
86400
62400
57960
36210
56865
14260
32308
13455
41650
18450
21440
13104
65880
66300
72380
44
39140
37925
70300
44370
32289
850
33920
34200
7280
126982
33250
73140
27004
30420
48951
4288
9373
9680
32160
8500
16380
149160
18250
255
1122
80
6800
9328
26048
45084
7830
17168
1188
17526
992
3025
45627
40
8850
7008
126
29684
4697
36750
7740
29315
270
4536
44215
10500
41616
7956
25520
3953
45
336
10974
6798
4752
14356

## Sheet: Sheet8
	Frequency
1	141
2	81
3	52
4	39
5	23
6	20
7	16
8	6
9	2
10	3
11	2
12	3
13	3
14	4
>15	10

## Sheet: Sheet3
1506		<1	54
1506		1-1.9	22
1520		2-2.9	30
1526		3-3.9	32
1558		4-4.9	40
1600		5-5.9	50
1620		6-6.9	42
1640		7-7.9	37
1680		8-8.9	23
1814		9-9.9	22
2150		10-10.9	20
2980		11-11.9	4
		12-12.9	7
		13-13.9	4
		14-14.9	6
		15-15.9	5
		16-16.9	4
		>17	3
